# Supplementary material for: Cell Cycle Stage Classification Using Phase Imaging with Computational Specificity
Source: PubMed Central journal article supplement — ACS Photonics. 2022 Mar 8;9(4):1264–73. doi: 10.1021/acsphotonics.1c01779 (PMC9026251; doi:10.1021/acsphotonics.1c01779), 2022-03-08
Supplement: ph1c01779_si_001.pdf [file ph1c01779_si_001.pdf]

Supporting Information for  
**Cell cycle stage classification using  
phase imaging with computational specificity**

Yuchen R. He<sup>1, 2, †</sup>, Shenghua He<sup>3, †</sup>, Mikhail E. Kandel<sup>1, 2, †</sup>, Young Jae Lee<sup>2, 4</sup>, Chenfei Hu<sup>1, 2</sup>, Nahil Sobh<sup>2, 5</sup>, Mark A. Anastasio<sup>1, 2, 6\*</sup>, and Gabriel Popescu<sup>1, 2, 6\*</sup>

<sup>1</sup>Department of Electrical and Computer Engineering, University of Illinois at Urbana-Champaign, Urbana, Illinois, 61801, USA

<sup>2</sup>Beckman Institute for Advanced Science and Technology, University of Illinois at Urbana-Champaign, Urbana, Illinois, 61801, USA

<sup>3</sup>Department of Computer Science & Engineering, Washington University in St. Louis, St. Louis, Missouri, 63130, USA

<sup>4</sup>Neuroscience Program, University of Illinois at Urbana-Champaign, Urbana, Illinois, 61801, USA

<sup>5</sup>NCSA Center for Artificial Intelligence Innovation, University of Illinois at Urbana-Champaign, Urbana, Illinois, 61801, USA

<sup>6</sup>Department of Bioengineering, University of Illinois at Urbana-Champaign, Urbana, Illinois, 61801, USA

<sup>†</sup>These authors contributed equally to this work

\* Corresponding authors: Gabriel Popescu and Mark Anastasio

**Email:** [gpopescu@illinois.edu](mailto:gpopescu@illinois.edu) and [maa@illinois.edu](mailto:maa@illinois.edu)

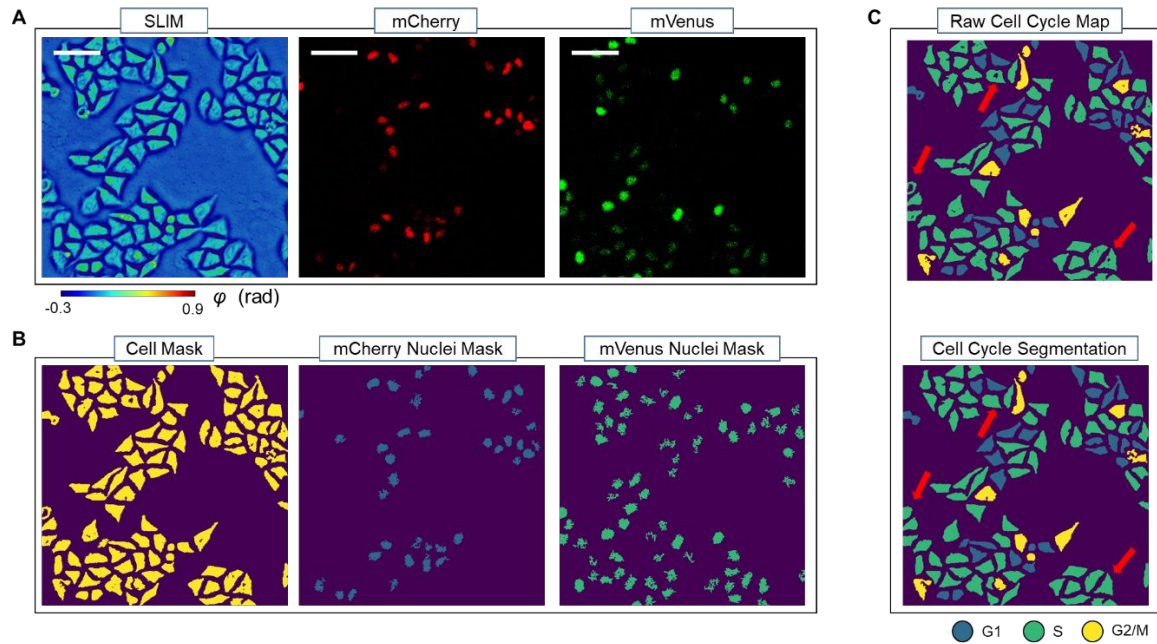

**Fig. S1. Ground truth mask generation workflow.** (A) Images from the SLIM channel (left), mCherry channel (middle) and the mVenus channel (right). (B) Preliminary masks generated from the SLIM and fluorescence images using adaptive thresholding. (C) Combining three masks in (B). Holes in cell masks were removed during analysis to avoid errors in cell dry mass and area. Scale bar is 100  $\mu\text{m}$ .

| Prediction \ True Label         | Background | G1     | S      | G2/M   |
|---------------------------------|------------|--------|--------|--------|
| Background<br>(n = 204,426,215) | 99.75%     | 0.03%  | 0.17%  | 0.05%  |
| G1<br>(n = 5,149,858)           | 1.50%      | 70.27% | 26.21% | 2.01%  |
| S<br>(n = 8,687,486)            | 1.88%      | 10.14% | 75.12% | 12.87% |
| G2/M<br>(n = 2,748,409)         | 1.37%      | 6.42%  | 30.19% | 62.02% |
| <b>Precision</b>                | 99.86%     | 76.34% | 72.13% | 56.13% |
| <b>Recall</b>                   | 99.75%     | 70.27% | 75.12% | 62.02% |
| <b>F1 Score</b>                 | 99.81%     | 73.18% | 73.59% | 58.93% |

**Fig. S2. PICS performance evaluated at a pixel level.**

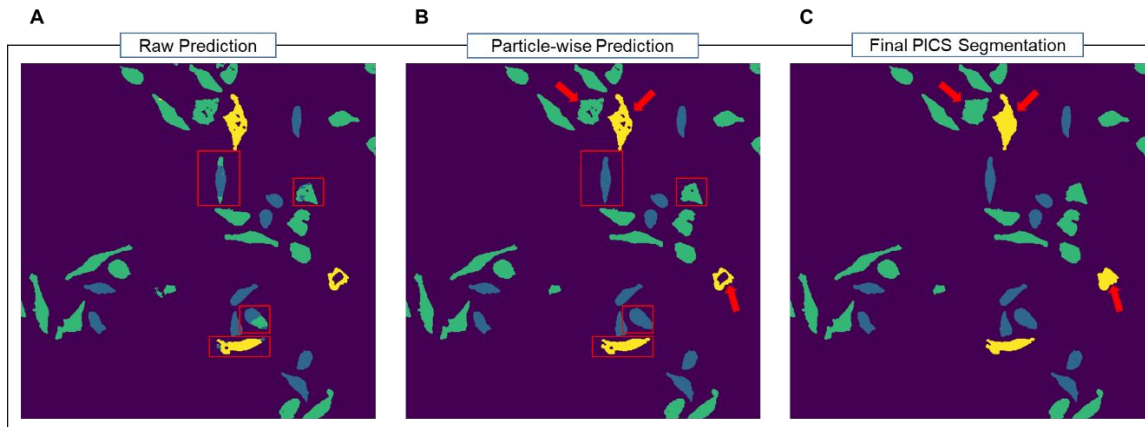

**Fig. S3. Post-processing workflow.** (A) Raw prediction from PICS. (B) Prediction map after enforcing particle consistency and removing small particles. A few examples were shown in the red rectangles. (C) Prediction map after filling in the holes in the masks. Masks at this stage were used for analysis.

**A**

|                            | Prediction |        |
|----------------------------|------------|--------|
| True Label                 | G1/S       | G2/M   |
| <b>G1/S</b><br>(n = 10893) | 93.23%     | 6.77%  |
| <b>G2/M</b><br>(n = 1787)  | 39.79%     | 60.21% |
| <b>Precision</b>           | 93.46%     | 59.35% |
| <b>Recall</b>              | 93.23%     | 60.21% |
| <b>F1 Score</b>            | 93.35%     | 59.78% |
| <b>Overall Accuracy</b>    | 88.58%     |        |

**B**

|                             | Prediction |        |
|-----------------------------|------------|--------|
| True Label                  | G1         | S/G2/M |
| <b>G1</b><br>(n = 4651)     | 73.98%     | 26.02% |
| <b>S/G2/M</b><br>(n = 8029) | 11.81%     | 88.19% |
| <b>Precision</b>            | 78.40%     | 85.41% |
| <b>Recall</b>               | 73.98%     | 88.19% |
| <b>F1 Score</b>             | 76.13%     | 86.78% |
| <b>Overall Accuracy</b>     | 82.98%     |        |

**Fig. S4. Confusion matrix after merging two labels together. (A)** Confusion matrix after we merge “G1” and “S” into one class. **(B)** Confusion matrix after we merge ‘S’ and “G2/M” into one class.
